# Supplementary material
Source: PubMed Central journal article supplement (PMC4040150)
Supplement: NIHMS560734-supplement-01.pdf [file NIHMS560734-supplement-01.pdf]

## Supplementary Information

### **HIV-Associated Distal Neuropathic Pain is Associated with Smaller Total Cerebral Cortical Gray Matter**

John R. Keltner MD, PhD <sup>16,1</sup>, Christine Fennema-Notestine PhD <sup>1,14</sup>, Florin Vaida PhD <sup>2</sup>, Dongzhe Wang <sup>17</sup>, Donald R. Franklin BS <sup>1</sup>, Robert H. Dworkin PhD <sup>5</sup>, Chelsea FitzSimons MPH <sup>1</sup>, J. Allen McCutchan MD <sup>10</sup>, Sarah L. Archibald PhD <sup>1</sup>, David J. Miller PhD <sup>17</sup>, George Kesidis PhD <sup>17</sup>, Clint Cushman <sup>1</sup>, Sung Kim <sup>18</sup>, Ian Abramson PhD <sup>1</sup>, Michael J. Taylor PhD <sup>1</sup>, Rebecca J. Theilmann PhD <sup>14</sup>, Michelle D. Julaton PhD <sup>1</sup>, Randy J. Notestine PhD <sup>1</sup>, Stephanie Corkran MA <sup>1</sup>, Mariana Cherner PhD <sup>1</sup>, Nichole A. Duarte MA <sup>1</sup>, Terry Alexander RN <sup>3</sup>, Jessica Robinson-Papp MD <sup>4</sup>, Benjamin B. Gelman MD <sup>7</sup>, David M. Simpson MD <sup>9</sup>, Ann C. Collier MD <sup>11</sup>, Christina M. Marra MD <sup>12</sup>, Susan Morgello MD <sup>9,13</sup>, Greg Brown PhD <sup>16,1</sup>, Igor Grant MD <sup>1</sup>, J. Hampton Atkinson MD <sup>16,1</sup>, Terry L. Jernigan PhD <sup>1,14,15</sup> and Ronald J. Ellis MD, PhD <sup>3</sup> for the CHARTER Group\*

1 Department of Psychiatry, University of California San Diego, San Diego, CA, USA. 2 Department of Family and Preventative Medicine, University of California San Diego, San Diego, CA, USA. 3 Department of Neurosciences, University of California San Diego, San Diego, CA, USA. 4 Department of Neurology, The Mount Sinai School of Medicine, New York, NY, USA. 5 Department of Anesthesiology, University of Rochester Medical Center, Rochester NY, USA. 7 Department of Pathology, University of Texas Medical Branch, Galveston, TX, USA. 9 Department of Neurology, Mount Sinai School of Medicine, New York, NY. 10 Department of Medicine, University of California San Diego, San Diego, CA, USA. 11 Department of Medicine, University of Washington, Seattle, WA, USA. 12 Department of Neurology, University of Washington, Seattle, WA, USA. 13 Department of Neuroscience, The Mount Sinai School of Medicine, New York, NY, USA. 14 Department of Radiology, University of California San Diego, San Diego, CA, USA. 15 Department of Cognitive Science, University of California San Diego, San Diego, CA, USA. 16 VA San Diego Healthcare System, San Diego, CA USA. 17 Pennsylvania State University, State College, PA USA, 18 Department of Bioengineering, University of California, San Diego, CA.

\*To whom correspondence should be addressed: E-mail: [jkeltner@ucsd.edu](mailto:jkeltner@ucsd.edu)

*Supplementary information contains:*

1. Supplementary text
2. Supplementary Tables

## SUPPLEMENTARY RESULTS

Supplementary table S1 shows that for the multivariable model, worse severity of DNP symptoms is significantly correlated with smaller cerebral cortical gray matter volume. Age, ethnicity, gender, cerebral-vault, scanner, history of D-drug use, history of inhalant abuse, history of methamphetamine abuse, and Global Deficit Score are also significantly correlated with smaller cerebral cortical gray matter volume. The definition (type and range) is included for each explanatory variable and the p-values (uncorrected for multiple comparisons) less than 0.20 are listed for each model of DNP and the log brain volumes.

The number of subjects with missing data is listed for each explanatory variable in supplementary table S1. Since the explanatory variable CSF HIV RNA is missing for 28 subjects, in Table 2 the number of subjects without missing data for the association between DNP and log cortical volume is 213. If CSF HIV RNA is removed during the multivariable model selection process the relationship between severity of DNP and smaller cerebral cortical gray matter volume is not significantly changed ( $R^2 = .83$ ;  $p = 0.008$ )

SUPPLEMENTARY TABLE S1: List of the explanatory variables used for the multivariable models of the association between DNP and log brain volumes. The definition (type and range), number of subjects with missing data for each variable, and the p-values (uncorrected for multiple comparisons) less than 0.20 are listed for each explanatory variable.

| VARIABLE                               | TYPE       | RANGE                                                                                                      | Number of subjects With Missing Data | Explanatory variables (P<0.20) for each brain volume multivariable model |                      |                    |                 |                   |                |
|----------------------------------------|------------|------------------------------------------------------------------------------------------------------------|--------------------------------------|--------------------------------------------------------------------------|----------------------|--------------------|-----------------|-------------------|----------------|
|                                        |            |                                                                                                            |                                      | Log Cortical Gray                                                        | Log Subcortical Gray | Log Abnormal White | Log Total White | Log Ventricle CSF | Log Sulcal CSF |
| Distal Neuropathic Pain                | Continuous | 0 - 4                                                                                                      | 0                                    | 0.0006                                                                   |                      |                    |                 | 0.009             | 0.16           |
| Age                                    | Continuous | 23 yo – 67 yo                                                                                              | 0                                    | <0.0001                                                                  | <0.0001              |                    |                 | <0.0001           | <0.0001        |
| Education                              | Continuous | 7 yrs – 20 yrs                                                                                             | 0                                    |                                                                          |                      | 0.122              |                 |                   |                |
| Ethnicity                              | Nominal    | See Table 1                                                                                                | 0                                    | 0.004                                                                    |                      | 0.069              |                 |                   |                |
| Gender                                 | Binary     | See Table 1                                                                                                | 0                                    | <0.0001                                                                  |                      | 0.082              | 0.022           |                   |                |
| Log-cerebralVault                      | Continuous | 13.5-14.3                                                                                                  | 0                                    | <0.0001                                                                  | <0.0001              | <0.0001            | <0.0001         | <0.0001           | <0.0001        |
| Scanner                                | Nominal    | 1 scanner Univ Wash<br>1 scanner Univ Texas<br>1 scanner Hopkins<br>2 scanners New York<br>2 scanners UCSD | 0                                    | <0.0001                                                                  | 0.039                | <0.0001            | 0.094           | 0.066             | 0.885          |
| HCV status                             | Binary     | See Table 1                                                                                                | 3                                    |                                                                          |                      | 0.002              |                 |                   |                |
| Plasma HIV RNA undetectable/detectable | Binary     | See Table 1                                                                                                | 3                                    |                                                                          |                      | 0.100              | 0.064           | 0.004             |                |
| CSF HIV RNA undetectable/detectable    | Binary     | See Table 1                                                                                                | 28                                   | 0.104                                                                    |                      |                    |                 |                   |                |
| Sqrt CD4 Nadir                         | Continuous | 0-38.7                                                                                                     | 0                                    |                                                                          | 0.097                | 0.016              | 0.086           |                   | 0.042          |
| Sqrt CD4 Current                       | Continuous | 2.64-42.46                                                                                                 | 3                                    |                                                                          | 0.012                |                    |                 |                   |                |
| Current D-drug Exp                     | Continuous | 0-110 months                                                                                               | 0                                    |                                                                          |                      |                    |                 |                   |                |
| On D-drugs (Y/N)                       | Binary     | On = 30<br>Off = 211                                                                                       | 0                                    | 0.171                                                                    |                      |                    |                 |                   |                |
| D-drug ever                            | Nominal    | 1= current<br>2= past<br>3= never                                                                          | 0                                    | 0.024                                                                    |                      |                    | 0.070           |                   |                |
| Total D-drug Exposure                  | Continuous | 0-261 months                                                                                               | 0                                    |                                                                          |                      |                    |                 |                   |                |
| # protease inhibitors                  | Continuous | 0-3                                                                                                        | 0                                    |                                                                          |                      | 0.119              |                 |                   |                |
| Current Antiretroviral Regimen         | Nominal    | See Table 1                                                                                                | 0                                    |                                                                          |                      |                    |                 | 0.014             |                |

|                                         |            |                  |   |       |       |       |       |       |       |
|-----------------------------------------|------------|------------------|---|-------|-------|-------|-------|-------|-------|
| Beck Depression Inventory II            | Continuous | 0-63             | 0 |       |       | 0.171 |       | 0.001 |       |
| Major Depression Current                | binary     | See Table 1      | 0 |       |       |       |       |       |       |
| Major Depression Ever                   | binary     | See Table 1      | 0 |       |       |       |       |       |       |
| Alcohol Abuse Ever                      | binary     | Yes=29<br>No=206 | 6 |       |       |       |       |       |       |
| Alcohol Dep Ever                        | Binary     | Yes=42<br>No=193 | 6 |       |       |       |       |       |       |
| Cannabis Abuse Ever                     | Binary     | Yes=43<br>No=198 | 0 |       |       | 0.016 | 0.126 | 0.099 |       |
| Cannabis Dependence Ever                | Binary     | Yes=29<br>No=206 | 0 |       |       | 0.074 | 0.020 | 0.043 | 0.037 |
| Cocaine Abuse Ever                      | Binary     | Yes=22<br>No=219 | 0 |       |       |       | 0.136 |       |       |
| Cocaine Dep Ever                        | Binary     | Yes=95<br>No=146 | 0 |       |       |       | 0.002 | 0.155 | 0.061 |
| Halucinogen abuse ever                  | Binary     | Yes=11<br>No=230 | 0 |       |       |       |       |       |       |
| Halucinogen Dependence Ever             | Binary     | Yes=5<br>No=236  | 0 |       |       |       |       |       |       |
| Inhalant Abuse Ever                     | Binary     | Yes=5<br>No=236  | 0 | 0.011 |       |       |       |       |       |
| Inhalant Dependence Ever                | Binary     | Yes=3<br>No=238  | 0 |       |       |       |       | 0.102 |       |
| Methamphetamine Abuse Ever              | Binary     | Yes=8<br>No=233  | 0 | 0.020 |       |       |       |       |       |
| Methamphetamine Dependence Ever         | Binary     | Yes=34<br>No=207 | 0 |       | 0.092 |       |       |       |       |
| Opiate Abuse Ever                       | Binary     | Yes=10<br>No=231 | 0 |       |       |       |       |       |       |
| Opiate Dependence Ever                  | Binary     | Yes=42<br>No=199 | 0 |       | 0.009 |       |       | 0.185 |       |
| Sedative Abuse Ever                     | Binary     | Yes=7<br>No=234  | 0 | 0.055 |       |       | 0.024 | 0.071 |       |
| Sedative Dependence Ever                | Binary     | Yes=10<br>No=231 | 0 |       |       |       |       |       |       |
| Global Deficit Score                    | Continuous | 0-3.47           | 0 | 0.002 |       | 0.003 |       | 0.004 | 0.144 |
| Opiate Pain Treatment                   | Binary     | Yes=42<br>No=199 | 0 |       |       |       |       | 0.072 |       |
| Tricyclic Antidepressant Pain Treatment | Binary     | Yes=23<br>No=218 | 0 |       |       |       |       |       |       |
| Anticonvulsant Pain Treatment           | Binary     | Yes=23<br>No=218 | 0 |       |       |       |       |       |       |

|                        |         |                |    |        |        |        |        |        |        |
|------------------------|---------|----------------|----|--------|--------|--------|--------|--------|--------|
| Traumatic Brain Injury | nominal | See Table<br>1 | 54 | No TBI |
|------------------------|---------|----------------|----|--------|--------|--------|--------|--------|--------|

We repeated the above cortical linear regression and t-test analysis using Minitab (Minitab 16 statistical software, Pennsylvania State University, 2010 - [www.minitab.com](http://www.minitab.com)), obtaining the same reported significance of variables as were previously obtained using JMP.

We then repeated this study using LIBSVM's implementation (Chang et al 2011) of Support Vector Regression (SVR) with Gaussian kernels (Smola et al 2004). By this nonlinear regression (Aksu et al 2010), we again confirmed (Table S2) that DNP was among the top ten most significant variables for predicting total cortical gray matter volume. We ran epsilon-SVR wrapped with recursive feature elimination (RFE) for 50 different random 5-fold splits of the data. For each split (trial) we selected the two SVR hyper-parameters to minimize the average held-out fold mean-squared prediction error. The sample mean and standard deviation of the average RFE-ranking of each feature over the 50 trials is given in Table S2. Note that after eliminating the features mean-ranked 4<sup>th</sup>, 7<sup>th</sup> and 8<sup>th</sup> because of high standard deviations, the DNP feature is mean-ranked 7<sup>th</sup> most significant variable for predicting total cortical gray matter volume.

SUPPLEMENTARY TABLE S2: The top 10 features by their mean ranks over 50 experimental trials which predict total cortical gray matter volume. Excluding the three bolded features (4<sup>th</sup>, 7<sup>th</sup>, and 8<sup>th</sup>) with negligible statistical significance owing to high sample standard deviation, DNP ranks seventh.

| mean feature ranks | Features                | Mean        | Stdev       |
|--------------------|-------------------------|-------------|-------------|
| 1                  | Log_cerebralVAULT       | 1           | 0           |
| 2                  | GDS                     | 2.42        | 0.55        |
| 3                  | Age                     | 2.61        | 2.54        |
| <b>4</b>           | <b>Sqrt cd4 current</b> | <b>4.36</b> | <b>8.18</b> |
| 5                  | Gender                  | 5.37        | 1.47        |
| 6                  | Ethnicity               | 6.79        | 0.16        |
| <b>7</b>           | <b>Education</b>        | <b>7.66</b> | <b>8.04</b> |
| <b>8</b>           | <b>Sed abuse</b>        | <b>7.68</b> | <b>6.59</b> |
| 9                  | Scanner                 | 8.34        | 0.50        |
| 10                 | DNP                     | 9.52        | 1.57        |
